# Supplementary figures and images for: Ancient Nuclear Plastid DNA in the Yew Family (Taxaceae)
Source: PubMed Central journal article supplement — Genome Biol Evol. 2014 Aug 1;6(8):2111–21. doi: 10.1093/gbe/evu165 (PMC4231637; doi:10.1093/gbe/evu165), 2014-08-01

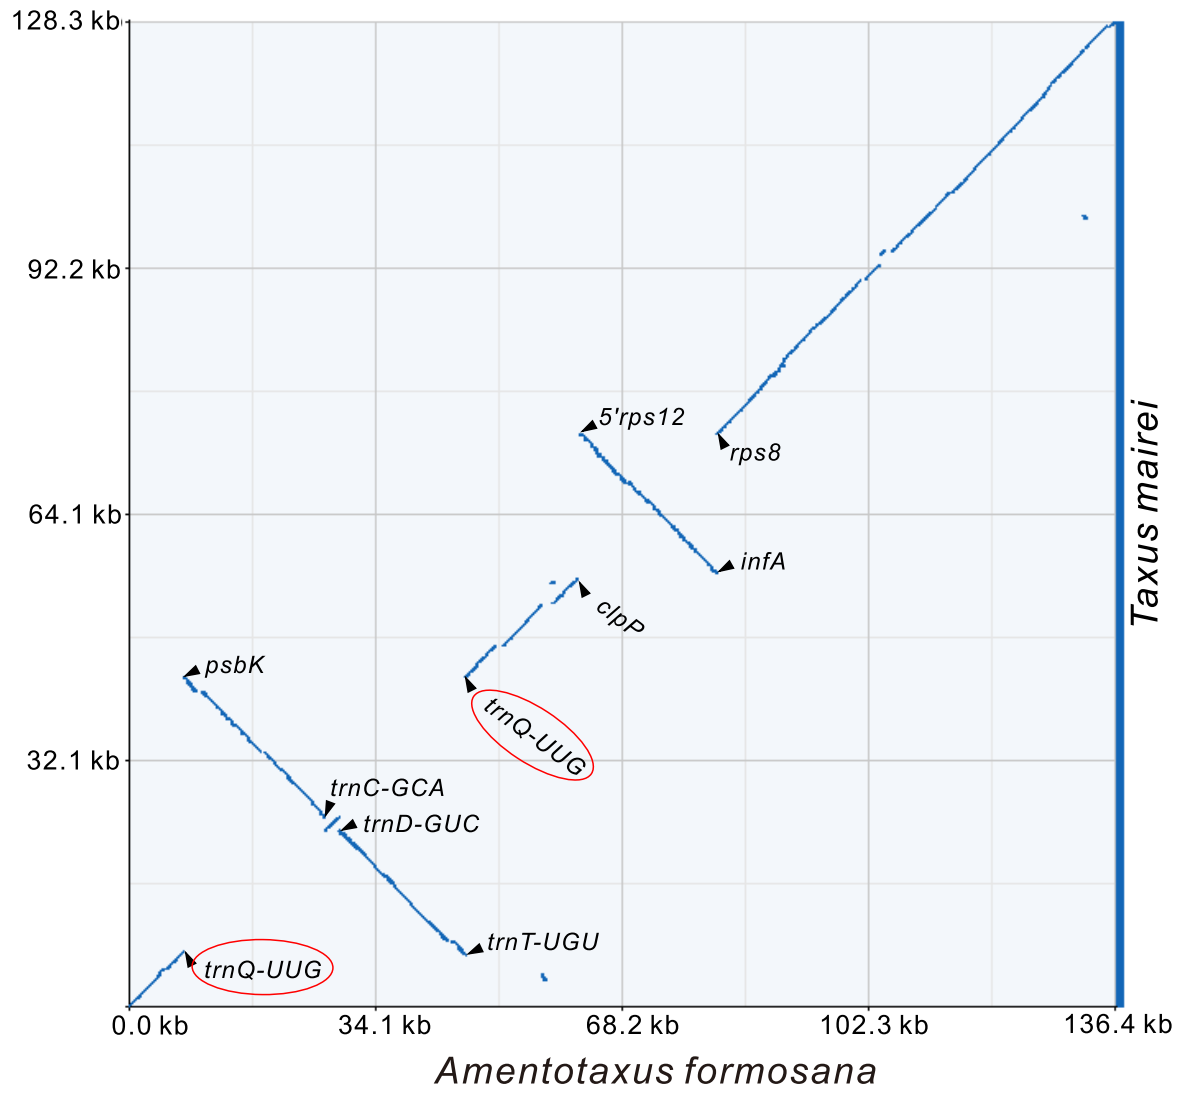

Figure S2

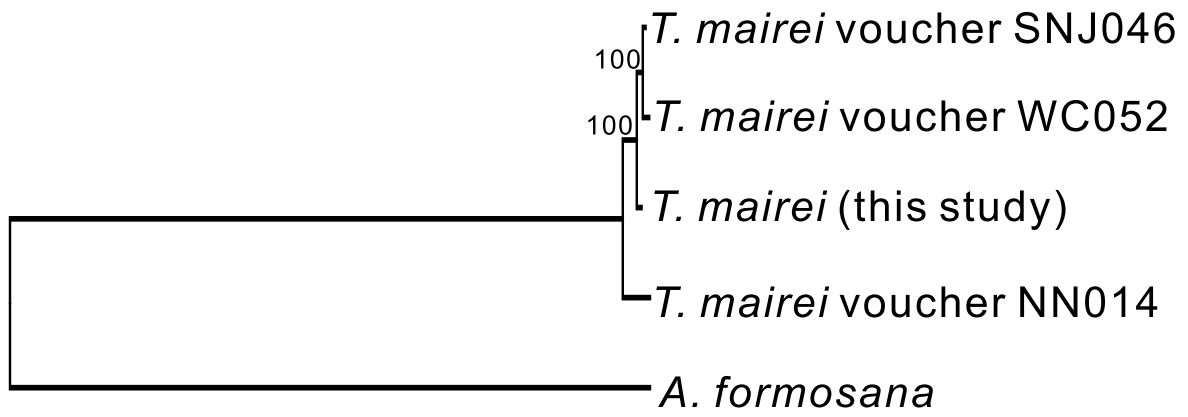

Figure S3

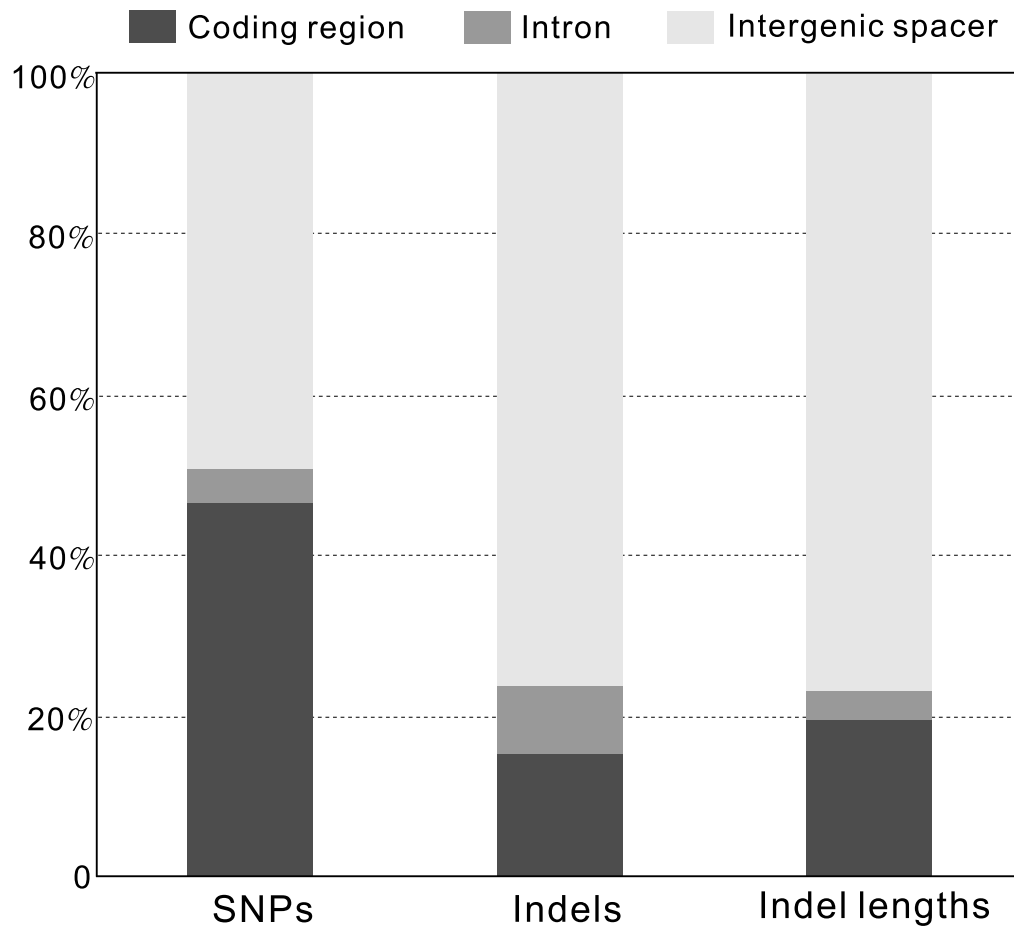

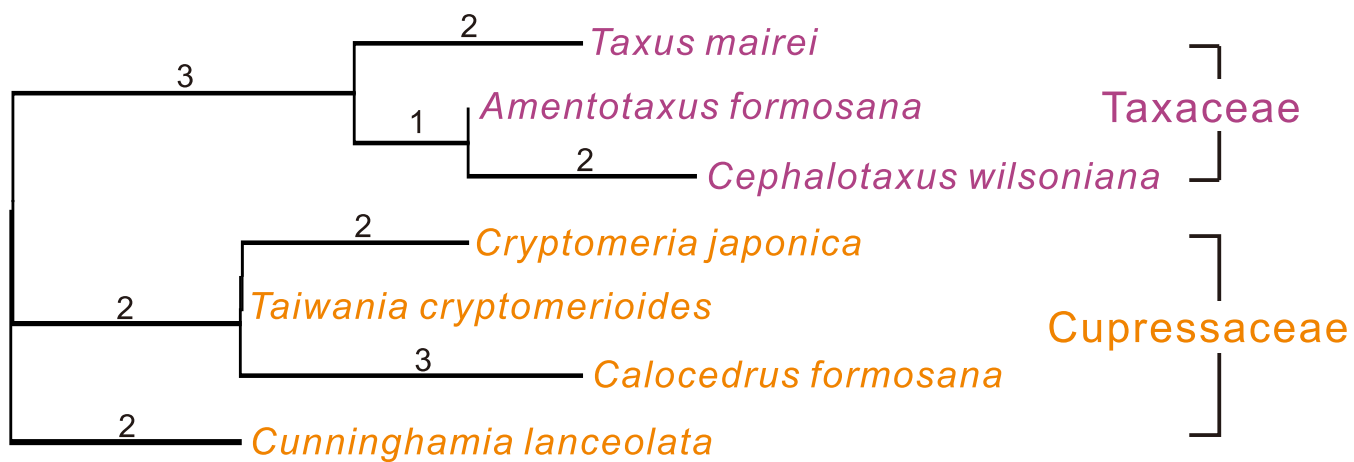

0.5

Supplement: supp_evu165_all_supplementary_figures.pdf [file supp_evu165_all_supplementary_figures.pdf]
